1 **Induction of p73,  $\Delta$ 133p53,  $\Delta$ 160p53, pAKT leads to neuroprotection via DNA**  
2 **repair by 5-LOX inhibition**

3 **Shashank Shekhar and Sharmistha Dey**

4 **Department of Biophysics All India Institute of Medical Sciences, New Delhi, India**

5

6

7

8

9

10

11

12 **Running title: p53 isoform and pAKT in neuroprotection**

13

14 To whom correspondence should be addressed:

15 \*Dr. Sharmistha Dey

16 Department of Biophysics

17 All India Institute of Medical Sciences

18 Ansari Nagar,

19 New Delhi - 110029, INDIA,

20 Tel:+91 - 11 - 2654 6435,

21 Fax:+91 - 11 - 2658 8663,

22 E-mail: sdey@aiims.edu

23 **Induction of p73,  $\Delta$ 133p53,  $\Delta$ 160p53, pAKT leads to neuroprotection via DNA**  
24 **repair by 5-LOX inhibition**

25 **Shashank Shekhar and Sharmistha Dey**

26 **Department of Biophysics All India Institute of Medical Sciences, New Delhi, India**

27 **Abstract**

28 Lipooxygenase-5 (5-LOX), protein is involved in the pathologic phenotype of AD which  
29 includes amyloid-plaque and tau hyperphosphorylation. This study aims to identify the  
30 mechanistic role in neuroprotection by peptide YWCS, the 5-LOX inhibitor in neurotoxic SH-  
31 SY5Y cell line developed by the treatment of  $A\beta_{25-35}$ . The cells were treated with  $A\beta_{25-35}$  and  
32 with different doses of YWCS. The effect on cell survival pathways were determined by western  
33 blot using polyclonal anti body of p53, anti-Akt and anti-phosphorylated-Akt.  
34 Immunoprecipitation and mass spectroscopic studies were done to identify the altered proteins.  
35 Over expression of phosphorylated-Akt and 3 bands of p53 isoforms were observed which  
36 correspond to p73,  $\Delta$ 133p53 and  $\Delta$ 160p53 in the cells treated only with 80 $\mu$ M of YWCS  
37 compare to untreated cells. However, no alteration of total p53 and Akt were observed. The  
38 results exposed the novel mechanistic pathway of neuroprotection by 5-LOX inhibition, which is  
39 likely to be mediated by DNA DSB repair through p53 isoforms and PI3K/Akt pathway. Our  
40 finding has opened a new window in the therapeutic approach for the prevention of AD.

41 **Key word:** Alzheimer's disease, p73,  $\Delta$ 133p53,  $\Delta$ 160p53, DNA DSB repair

42

## 43 **Introduction**

44 Alzheimer's disease (AD) is the most common cause of dementia in the elderly. Due to  
45 increasing longevity and the lack of therapy, AD has become not only a major health problem  
46 but also imposes substantial social and economic burden worldwide[1]. The inflammatory  
47 process plays a key role in neurodegenerative disorder. The inflammatory molecule, 5-  
48 lipooxygenase (5-LOX), protein is involved in the pathologic phenotype of AD which includes  
49 A $\beta$  amyloid deposition and tau hyperphosphorylation. Recent research from our lab has proposed  
50 the role of 5-LOX peptide inhibitor as neuroprotective molecule for AD[2], provides rescue to  
51 neuronal cells from amyloid induced proteotoxic stress/neurotoxicity. The 5-LOX peptide  
52 inhibitor reduced  $\gamma$ -secretase expression as well as tau hyperphosphorylation at threonine 181.  
53 The mechanistic detail of the 5-LOX inhibitor is still to be elaborated to understand how this  
54 inhibitor is providing rescue to neuronal cells from amyloid beta induced neurotoxicity. Some  
55 previous studies have shown that 5-LOX inhibitor accelerates the phosphorylation of Akt and  
56 thereby provides rescue to cells[3]. It is also reported that 5-LOX regulate p53 activity[4] and  
57 p53 isoform  $\Delta$ 113p53/ $\Delta$ 133p53 promotes DNA double-strand break repair to protect cell from  
58 death and senescence in response to DNA damage[5]. In a recent finding it has been reported  
59 that the p53 isoform; p73 plays an important role in the DNA repair pathway in coordination  
60 with another isoform of low molecular weight;  $\Delta$ 133p53[6]. The  $\Delta$ 160p53 is a recently identified  
61 isoform of p53 and have role in senescence and DNA repair but the detailed function of it is still  
62 illusive[7]. The neuroprotective role for p53 was reported in an in-vivo model of tau-mediated  
63 neurodegeneration relevant to Alzheimer's disease and related disorders. All these findings are  
64 illustrated the importance of Akt, p53, p73,  $\Delta$ 133p53 and  $\Delta$ 160p53 in cell survival pathway.  
65 Their role in AD pathogenesis is not yet studied. Here, for the first time we have identified the

66 involvement of p73,  $\Delta$ 133p53 and  $\Delta$ 160p53 in amyloid beta induced neurotoxicity and the novel  
67 pathway of neuroprotection by YWCS peptide inhibitor of 5-LOX via p73,  $\Delta$ 133p53 and  
68  $\Delta$ 160p53.

## 69 **Materials and Methods**

### 70 **Solid phase Peptide Synthesis and processing**

71 The peptides were synthesized by solid phase peptide synthesizer PS3 (Protein technology,  
72 USA) using Fmoc and Wang resin chemistry. The purity of the peptide was verified by analytical  
73 RP-HPLC as described earlier[8]. Briefly, the solvent used for the synthesis was  
74 dimethylformamide (DMF) and 2-(1H-Benzotriazole-1-yl)-1,1,3,3-tetramethyluronium  
75 hexafluorophosphate (HBTU) was used as an activator. Fmoc was deprotected by 20%  
76 piperidine and wang resin was cleaved by Trifluoroacetic acid (TFA). The peptides were  
77 precipitated from dry ether.

### 78 **Preparation of aggregated A $\beta$ peptide**

79 The A $\beta$ <sub>25-35</sub> peptide was dissolved in nuclease free water and then incubated for 5 days at 37°C  
80 and constant shaking in incubator shaker. The aggregation of peptide was confirmed by  
81 Thioflavin T (ThT) assay and the scanning electron microscopy.

### 82 **Cells and treatment**

83 SH-SY5Y cells were obtained from NCCS, Pune, India and maintained in Ham's F12 Nutrient  
84 media (Gibco) supplemented with 10% (v/v) fetal bovine serum and 1% antibiotic-anti-mycotic  
85 solution (Gibco). The cells used in the experiment were of passage number 30-33. Before  
86 starting the experiments, cells were authenticated by STR profiling (DNA forensic laboratory

87 Private limited, India). The cells were maintained at 37°C and 5% CO<sub>2</sub> under humidified  
88 condition. Cells were grown as monolayer.

89 SH-SY5Y cells were plated at a density of 1×10<sup>6</sup> cells per T25 flask and kept in CO<sub>2</sub> incubator at  
90 37°C overnight to adhere. Cells were differentiated by the treated of 20 μM retinoic acid in fresh  
91 complete media [9,10] for 7 days where media was replaced every 2<sup>nd</sup> day. On 7<sup>th</sup> day, cells were  
92 treated with different concentrations of YWCS (20, 40 and 80μM) and Aβ<sub>25-35</sub> (20 μM) peptide  
93 for 72 h simultaneously. Aβ<sub>25-35</sub> and YWCS peptide were synthesized by solid phase peptide  
94 synthesis as described previously [8].

#### 95 **Western blot:**

96 Cells were harvested and lysate was prepared in RIPA buffer (10mM Tris- HCl pH-8.0, 140mM  
97 NaCl, 1mM EDTA pH 8.0, 0.1% sodium deoxycholate, 1% Triton X100, 0.1% SDS, 0.1mM  
98 ethylene glycol tetra-acetic acid pH-8.0, 1mM Protease inhibitor, 1mM phenylmethanesulfonyl  
99 fluoride). The expression of p53, Akt and p-Akt were determined by western blotting as  
100 described previously [11]. Briefly, 30μg of total protein was separated on 12% SDS gel and  
101 protein was transferred on PVDF membrane (mdi, India). Membrane was blocked in 5%NFM  
102 and then incubated with primary antibodies of following proteins: p53 (1:500, Santa Cruz), Akt  
103 p-Akt, (1:1000, abchem). Membrane were developed with chemiluminescent substrate west Pico  
104 (Thermo scientific).

#### 105 **Immunoprecipitation**

106 After treatment with YWCS cells were lysed in RIPA buffer as described above. Total protein  
107 (100μg) was incubated overnight at 4°C with 1μg of anti-human p53 polyclonal antibody in a

108 reaction buffer of 0.1 % BSA in PBS. The protein agarose beads (30 $\mu$ L pre washed with 0.1 %  
109 BSA) were added in the reaction and incubated for 4 h at 4°C. After 4 h beads were washed 3  
110 times with wash buffer (10mMTris-HCl pH 7.5, 1mM EDTA, 1mM EGTA, 150mM NaCl, 0.2  
111 mM sodium orthovanadate, 1 mM PMSF). Beads were eluted with 0.2 M glycine pH 2.6 in 1:1  
112 ratio. After elution all the fractions were pulled and neutralized by adding Tris-HCl pH 8.0.

### 113 **Mass Spectroscopy**

114 Immunoprecipitated samples were separated on 10 % SDS-PAGE. IgG was used as negative  
115 control. Then bands were carefully cut and sent to Sandor Life Sciences, India for the mass  
116 spectroscopy.

## 117 **Results**

### 118 **Preparation of aggregated A $\beta$ peptide**

119 Thioflavin-T is a dye specific for detection of fibrillation of proteins. It has an excitation  
120 wavelength at 440nm and the emission wavelength at 480nm.ThT assay had shown high  
121 intensity after 4 days for it's aggregation status (Figure 1 A). The results were further confirmed  
122 by scanning electron microscopy for the aggregation of peptide after incubation of 4 days (Figure  
123 1 B and C).

### 124 **Western blot for Akt and p-Akt**

125 The western blot for Akt and p-Akt were carried out to check the effect of YWCS peptide on  
126 their expression and phosphorylation status. Our results suggest that the inhibition of 5-LOX  
127 with YWCS peptide had no effect on the Akt expression, while increased the phosphorylated Akt  
128 (Figure 2). This indicated that, YWCS peptide induced the phophorylation of Akt protein. Some

129 recent literature reported that the p-Akt has inhibitory effect on apoptosis. Our study first time  
130 provides an evidence for phosphorylation of Akt by inhibiting 5-LOX with peptide inhibitor and  
131 thereby prevents neurotoxicity.

### 132 **Western blot for p53**

133 The western blot for p53 was performed with poly clonal antibody against human p53 since it  
134 has several isoforms and play diverse role in cell survival regulation. To our surprise we  
135 observed that there was no change in the expression of p53 protein upon treatment with the  
136 YWCS but 3 other bands were observed in the cells while treated with 80 $\mu$ M of YWCS. These  
137 bands were not present in any other treatment groups (Figure 3).

### 138 **Identification of proteins which were expressed by the treatment of YWCS**

139 Immunoprecipitation was performed followed by mass spectroscopy. Immunoblot of pull down  
140 showed the enrichment of the target proteins (Figure 4A). After immunoprecipitation, pull down  
141 was separated on SDS-PAGE and IgG was used as control (Figure 4B). Bands were then sent for  
142 mass spectroscopy. The mass result confirmed our hypothesis that the 5-LOX inhibition by  
143 peptide induced the expression of p53 isoforms p73,  $\Delta$ 133p53 and  $\Delta$ 160p53 (Figure 5 A, B and  
144 C). Our study first time demonstrated the role of p73,  $\Delta$ 133p53 and  $\Delta$ 160p53 in neuroprotection.  
145 The expression of these isoforms was induced in the 80 $\mu$ M peptide treated cells. These isoforms  
146 of p53 activates DNA double strand break repair. This study showed 5-LOX inhibitor activated  
147 these isoforms and prevented neurotoxicity via DNA double strand break repair pathway. This  
148 finding opens a new window of mechanistic pathway for 5-LOX inhibition and neuroprotection  
149 under oxidative stress and DNA damage.

150 **Discussion:**

151 AD is age associated disease, progressive with extracellular amyloid-beta ( $A\beta$ ) deposits  
152 intracellular aggregates of hyperphosphorylated tau and neurofibrillary tangles. Ageing process  
153 normally arises DNA damage and in AD excessive DNA damage occurs due the  $A\beta$ -induced  
154 oxidative stress. In our previous work, we found that inhibition of 5-LOX prevented the  
155  $A\beta$  induced neurotoxic effect in SH-SY5Y cells and downregulated the expression of  $\gamma$ -  
156 secretase components [2]. 5-LOX is a direct p53 target gene in humans. The p53 protein  
157 involved in DNA repair, down regulated in AD[12]. In the mammalian cell, p53 was found to be  
158 modulate the DNA repair and stimulate both removal of damaged bases and nucleotide re-  
159 insertion [13]. To ensure the effect on p53 through 5-LOX inhibition under neurotoxic condition  
160 in cells, we performed western blot with treated SH-SY5Y cells by 3 different concentrations  
161 (20, 40 and 80  $\mu$ M) of YWCS using p53 polyclonal antibody against human p53. No alteration  
162 of p53 protein was observed, but 4 different bands appeared only at high concentration (80  $\mu$ M)  
163 of peptide. This distinction leads us to search the protein bands by immunoprecipitation and  
164 mass spectroscopy, which revealed three isoforms of p53 corresponds to p73,  $\Delta$ 133p53 and  
165  $\Delta$ 160p53. While going through literature we came to know that these isoforms play vital and  
166 diverse role in cell survival regulation. The isoforms of p53 are found to be pro-survival factor  
167 for DNA damage stress and their expression prevents apoptosis and promotes DNA-DSB repair.  
168 Some more recent studies have proposed the role of p53 isoforms in the cell survival such as  
169  $\Delta$ 133p53/ $\Delta$ 113p53 by repairing DNA damage in cells during low level of oxidative stress or  
170 reactive oxygen species (ROS). However, the full length p53 inhibits DNA-DSB repair. The  
171 present work found high expression of p53 isoforms in the  $A\beta$  induced neurotoxic SH-SY5Y



172 cells treated by only at higher concentration of peptide YWCS in compare to untreated cells and  
173 thereby prevented neurotoxicity. However, no alteration of p53 was observed in treated cells.

174 The higher expression level of  $\Delta 160p53$  and p73 isoforms was observed in treated SH-SY5Y  
175 cells with peptide (80  $\mu\text{M}$  YWCS). The internal promoter originates the  $\Delta 133p53$  mRNA codes  
176 both the isoforms,  $\Delta 133p53$  and  $\Delta 160 p53$ . Though  $\Delta 160p53$  is the conserved isoform, very little  
177 information is available about it so far. Another study reported both p73 and  $\Delta 133p53$   
178 synergistically promote the expression of DNA repairing genes RAD51, LIG4 and RAD52 by  
179 homologous recombination (HR), non-homologous end joining (NHEJ) and single-strand  
180 annealing (SSA) and thereby promote DNA DSB repairing, which supports our study.

181 Inhibition of 5-LOX by YWCS peptide inhibitor was also upregulated the phosphorylation of  
182 Akt in SH-SY5Y cells. There is evidence of neuroprotective effects by stimulating PI3K/Akt  
183 signaling plays a pivotal role in neuronal survival [14]. Previous studies suggested that PI3K/Akt  
184 signaling was downregulated in the AD brain [15] and activation of this pathway showed to  
185 prevent A $\beta$ -induced neuronal neurotoxicity. Akt has well established role in cell cycle control  
186 and in DNA repair by check point activation in late G2 phase.

187 This study first time reported the rescue of A $\beta$  induced neurotoxicity by the treatment of 5-LOX  
188 inhibitor by activating the expression of  $\Delta 160p53$ , p73 and  $\Delta 133p53$ in SH-SY5Y cells. The  
189 results reveal that the mechanistic pathway for the prevention of neurotoxic effect by targeting  
190 the inhibition of 5-LOX may proceed by DNA DSB repair, by stimulating p53 isoforms and  
191 PI3K/Akt pathway. Thus repairing the DNA damage ameliorates the AD pathologies. The results  
192 exposed the novel mechanistic pathway of neuroprotection by 5-LOX inhibition mediated by

193 DNA DSB repair through p53 isoforms and PI3K/Akt signaling pathway. Our finding has  
194 opened a new window in the therapeutic approach for the prevention of AD.

195 **Acknowledgments:** Authors acknowledge intramural grant, Research Section, All India Institute  
196 of Medical Sciences (A-422) for providing funds for the consumable items and CSIR,  
197 Government of India for the fellowship of Shashank Shekhar.

198 **Conflict of Interest:** Authors show no conflict of interest.

199 **Role of the authors:** SS performed the entire experiment and study concept. SD was responsible  
200 for the study concept, design and wrote the paper.

201 **References:**

- 202 1. Tarawneh R, Holtzman DM (2012) The clinical problem of symptomatic Alzheimer disease  
203 and mild cognitive impairment. *Cold Spring Harb Perspect Med* **2**: a006148.
- 204 2. Shekhar S, Yadav SK, Rai N, Kumar R, Yadav Y, Tripathi M, Dey AB, Dey S (2018) 5-  
205 LOX in Alzheimer's Disease: Potential Serum Marker and In Vitro Evidences for Rescue  
206 of Neurotoxicity by Its Inhibitor YWCS. *Mol Neurobiol* **55**: 2754–2762.
- 207 3. Tu X-K, Zhang H-B, Shi S-S, Liang R-S, Wang C-H, Chen C-M, Yang W-Z (2016) 5-LOX  
208 Inhibitor Zileuton Reduces Inflammatory Reaction and Ischemic Brain Damage Through  
209 the Activation of PI3K/Akt Signaling Pathway. *Neurochem Res* **41**: 2779–2787.
- 210 4. Catalano A, Rodilossi S, Caprari P, Coppola V, Procopio A (2005) 5-Lipoxygenase  
211 regulates senescence-like growth arrest by promoting ROS-dependent p53 activation.  
212 *EMBO J* **24**: 170–179.

- 213 5. Gong L, Gong H, Pan X, Chang C, Ou Z, Ye S, Yin L, Yang L, Tao T, Zhang Z, et al.  
214 (2015) p53 isoform  $\Delta 113p53/\Delta 133p53$  promotes DNA double-strand break repair to protect  
215 cell from death and senescence in response to DNA damage. *Cell Res* **25**: 351–369.
- 216 6. Gong H, Zhang Y, Jiang K, Ye S, Chen S, Zhang Q, Peng J, Chen J (2018) p73 coordinates  
217 with  $\Delta 133p53$  to promote DNA double-strand break repair. *Cell Death Differ* **25**: 1063–  
218 1079.
- 219 7. Marcel V, Perrier S, Aoubala M, Ageorges S, Groves MJ, Diot A, Fernandes K, Tauro S,  
220 Bourdon J-C (2010)  $\Delta 160p53$  is a novel N-terminal p53 isoform encoded by  $\Delta 133p53$   
221 transcript. *FEBS Lett* **584**: 4463–4468.
- 222 8. Singh AK, Singh R, Naz F, Chauhan SS, Dinda A, Shukla AA, Gill K, Kapoor V, Dey S  
223 (2012) Structure based design and synthesis of peptide inhibitor of human LOX-12: in vitro  
224 and in vivo analysis of a novel therapeutic agent for breast cancer. *PLoS ONE* **7**: e32521.
- 225 9. Pählman S, Ruusala AI, Abrahamsson L, Mattsson ME, Esscher T (1984) Retinoic acid-  
226 induced differentiation of cultured human neuroblastoma cells: a comparison with  
227 phorbol ester-induced differentiation. *Cell Differ* **14**: 135–144.
- 228 10. König G, Masters CL, Beyreuther K (1990) Retinoic acid induced differentiated  
229 neuroblastoma cells show increased expression of the beta A4 amyloid gene of Alzheimer's  
230 disease and an altered splicing pattern. *FEBS Lett* **269**: 305–310.
- 231 11. Shekhar S, Yadav Y, Singh AP, Pradhan R, Desai GR, Dey AB, Dey S (2018)  
232 Neuroprotection by ethanolic extract of *Syzygium aromaticum* in Alzheimer's disease like  
233 pathology via maintaining oxidative balance through SIRT1 pathway. *Exp Gerontol* **110**:  
234 277–283.

- 235 12. Lovell MA, Gabbita SP, Markesbery WR (1999) Increased DNA oxidation and decreased  
236 levels of repair products in Alzheimer's disease ventricular CSF. *J Neurochem* **72**: 771–  
237 776.
- 238 13. Boesch P, Weber-Lotfi F, Ibrahim N, Tarasenko V, Cosset A, Paulus F, Lightowlers RN,  
239 Dietrich A (2011) DNA repair in organelles: Pathways, organization, regulation, relevance  
240 in disease and aging. *Biochim Biophys Acta* **1813**: 186–200.
- 241 14. Liu Y, Yang X, Lei Q, Li Z, Hu J, Wen X, Wang H, Liu Z (2015) PEG-PEI/siROCK2  
242 Protects Against A $\beta$ 42-Induced Neurotoxicity in Primary Neuron Cells for Alzheimer  
243 Disease. *Cell Mol Neurobiol* **35**: 841–848.
- 244 15. Liu Y, Liu F, Grundke-Iqbal I, Iqbal K, Gong C-X (2011) Deficient brain insulin signalling  
245 pathway in Alzheimer's disease and diabetes. *J Pathol* **225**: 54–62.

246

247

248

249

250

251

252

253

254

255

256

257 **Figure legends:**

258 **Figure 1.** Aggregation of A $\beta$ <sub>25-35</sub> peptide. (A) There was drastic change in the florescence  
259 intensity after 4 days of aggregation. (B) Electron microscopic image of A $\beta$ <sub>25-35</sub> peptide prior to  
260 aggregation. (C) Electron microscopic image of A $\beta$ <sub>25-35</sub> peptide after aggregation.

261 **Figure 2.** Western blot of expression of Akt and the phosphorylation of Akt at ser473 after  
262 treatment by YWCS in SH-SY5Y cells. There was no change in the level of Akt but there was  
263 phosphorylation of Akt only in 80  $\mu$ M of YWCS treated cells.

264 **Figure 3.** Western blot for p53. Expression of p73 and low molecular weight isoforms of p53 i.e.  
265  $\Delta$ 133p53 and  $\Delta$ 160p53 in 80 $\mu$ M of YWCS treated cells. Beta actin was used as the loading  
266 control.

267 **Figure 4.** Immunoprecipitation (IP) of p53. (A) immunoblot of IP samples. (B) SDS page of  
268 Immunoprecipitate. IgG was used as negative control.

269 **Figure 5.** Mass spectroscopy of bands form IP. (A) Identified as p73, (B) identified as  $\Delta$ 133p53  
270 and (C) identified as  $\Delta$ 160p53 isoforms of p53.

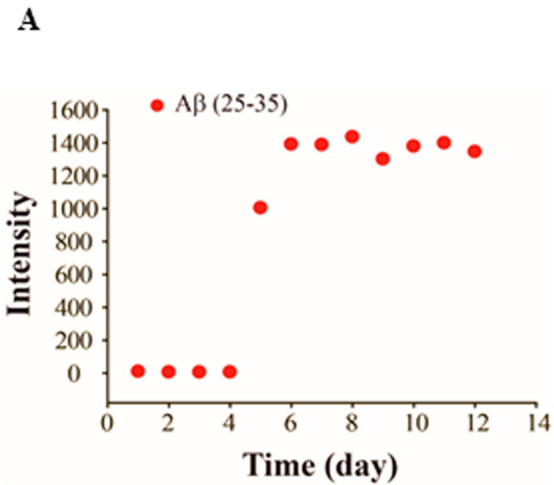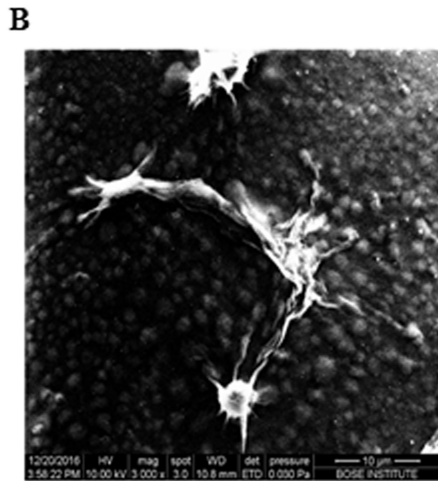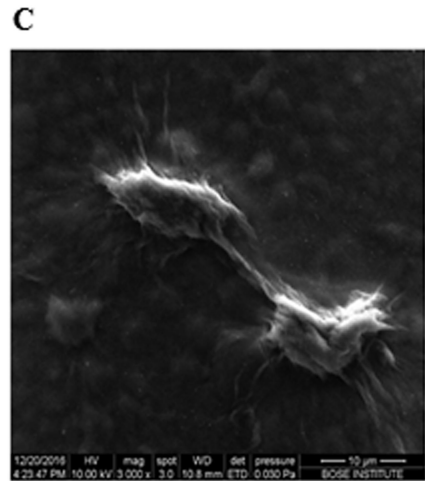



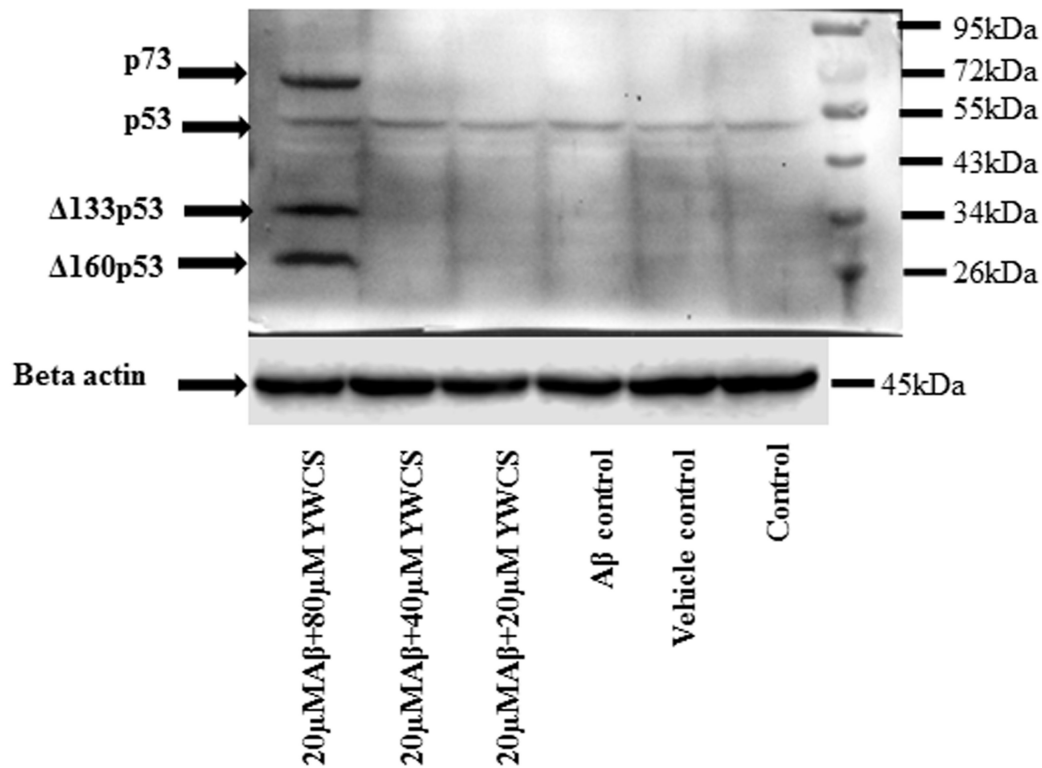



**A**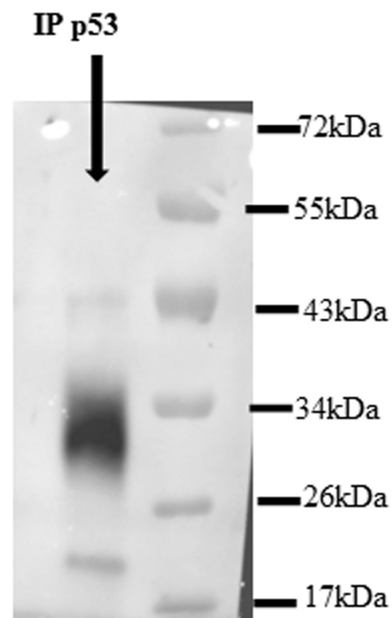**B**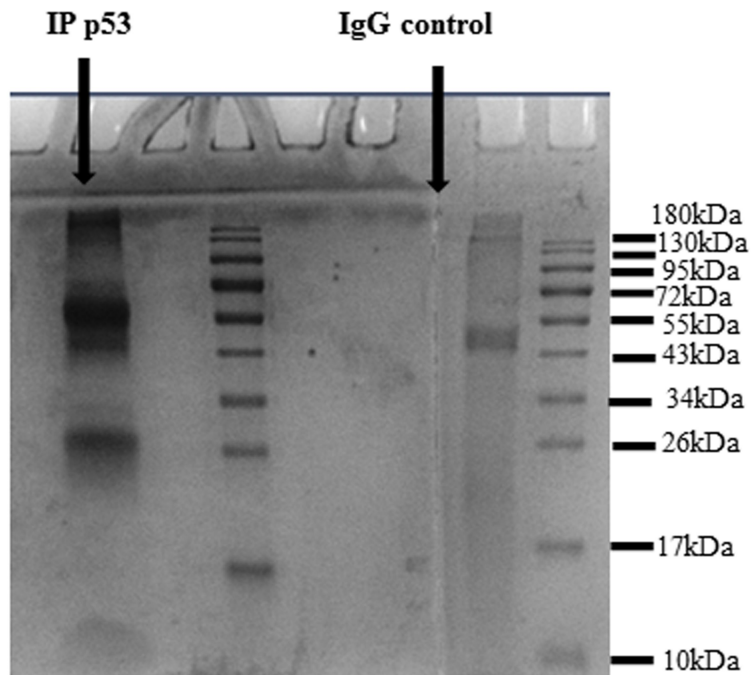

**(A) p73**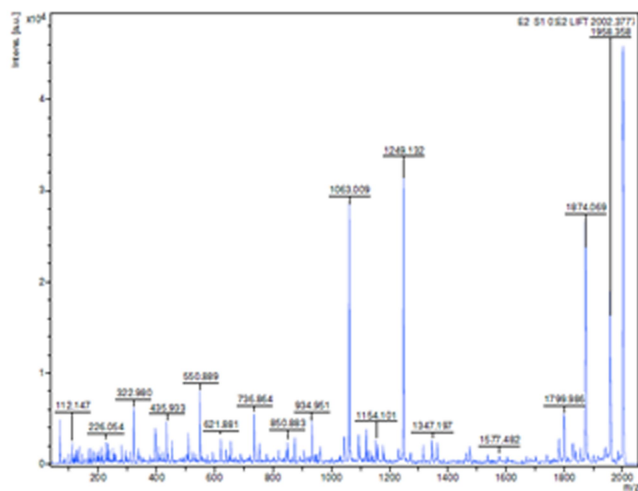**MASCOT SEARCH RESULTS**

User : Sankar  
 Email : sankar@andor.co.in  
 Search title :  
 MS data file : pmk11st.xml  
 Database : P53\_Human\_Human\_20180602 (678 sequences; 28084 residues)  
 Timestamp : 2 Jun 2018 at 06:44:42 GMT  
 Top Score : 76 for **NP\_001135547.1**, IckB; Backbone: full-length protein p73; AltName: Full-length transcription factor; AltName: Full-length-related pr

**Mascot Score Histogram**

Protein score is  $-10 \cdot \log(P)$ , where  $P$  is the probability that the observed match is a random event.  
 Protein scores greater than 41 are significant ( $p < 0.05$ ).

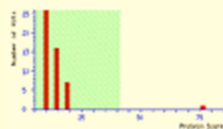**Protein Summary Report**

Format As: Protein Summary [Help](#)  
 Significance threshold  $p < 0.05$  Max. number of hits 20  
 Preferred taxonomy: All entries  
[Re-Search All](#) [Search Unmatched](#)

6/2/2018 Protein Summary Report (.JData/20180602/F005774.dxt)

**(B) Δ133p53**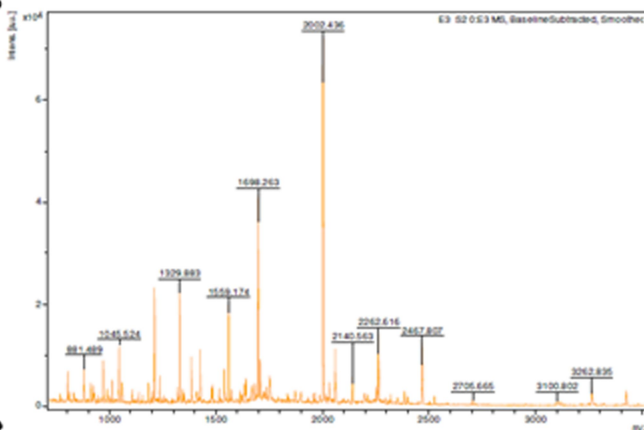**MASCOT SEARCH RESULTS**

User : Sankar  
 Email : sankar@andor.co.in  
 Search title :  
 MS data file : pmk11st.xml  
 Database : P53\_Human\_Human\_20180602 (678 sequences; 28084 residues)  
 Timestamp : 2 Jun 2018 at 10:29:08 GMT  
 Top Score : 98 for **NP\_001135547.1**, cellular tumor antigen p53 isoform  $\gamma$  [Homo sapiens]

**Mascot Score Histogram**

Protein score is  $-10 \cdot \log(P)$ , where  $P$  is the probability that the observed match is a random event.  
 Protein scores greater than 41 are significant ( $p < 0.05$ ).

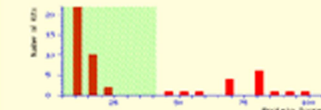**Protein Summary Report**

Format As: Protein Summary [Help](#)  
 Significance threshold  $p < 0.05$  Max. number of hits 20  
 Preferred taxonomy: All entries  
[Re-Search All](#) [Search Unmatched](#)

6/2/2018 Protein Summary Report (.JData/20180602/F005778.dxt)

**(C) Δ160p53**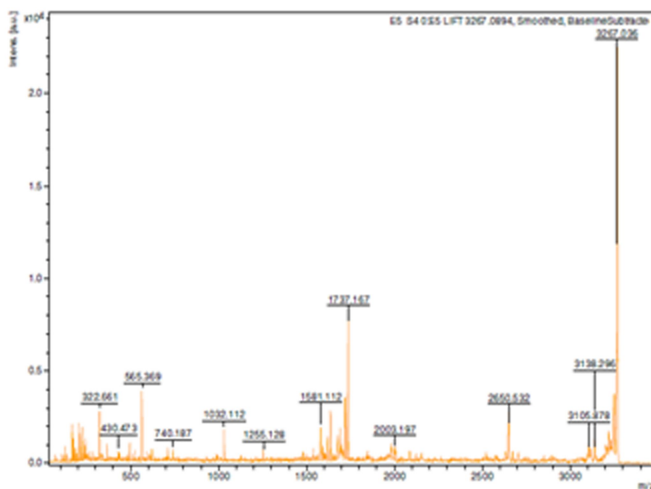**MASCOT SEARCH RESULTS**

User : Sankar  
 Email : sankar@andor.co.in  
 Search title :  
 MS data file : pmk11st.xml  
 Database : P53\_Human\_Human\_20180602 (678 sequences; 28084 residues)  
 Timestamp : 2 Jun 2018 at 12:39:46 GMT  
 Top Score : 93 for **NP\_001135547.1**, cellular tumor antigen p53 isoform  $\delta$  [Homo sapiens]

**Mascot Score Histogram**

Protein score is  $-10 \cdot \log(P)$ , where  $P$  is the probability that the observed match is a random event.  
 Protein scores greater than 41 are significant ( $p < 0.05$ ).

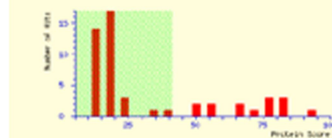**Protein Summary Report**

Format As: Protein Summary [Help](#)  
 Significance threshold  $p < 0.05$  Max. number of hits 20  
 Preferred taxonomy: All entries  
[Re-Search All](#) [Search Unmatched](#)
